# Supplementary material for: The key role of CYC2 during meiosis in Tetrahymena thermophila
Source: PubMed Central journal article supplement (PMC4818844; doi:10.1007/s13238-016-0254-9), 2016-03-23
Supplement: 13238_2016_254_MOESM7_ESM.pdf [file 13238_2016_254_MOESM7_ESM.pdf]

## (I) Supplementary materials

Supplementary tables (Table S1-S6) were in the format of MS Excel forms and uploaded separately.

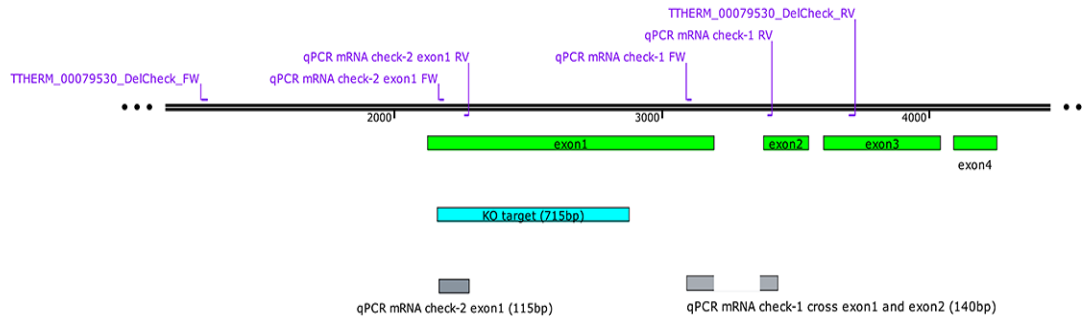

### Supplementary Figure 1

**Primer sets in UTR and CDS of THERM\_00079530 (CYC2):** KO target 715bp: Knock-out target sequence was 715bp long in exon1 in CDS of THERM\_00079530. THERM\_00079530\_DelCheck\_FW and THERM\_00079530\_DelCheck\_RV were primers for whole cell extract PCR (**Figure 1B**). qPCR mRNA check-1 FW and qPCR mRNA check-1 RV were primers for RT-qPCR product across exon1 and exon2 of CYC2 CDS and qPCR mRNA check-2 exon1 FW and qPCR mRNA check-2 exon1 RV were primers for RT-qPCR product in exon1.

A

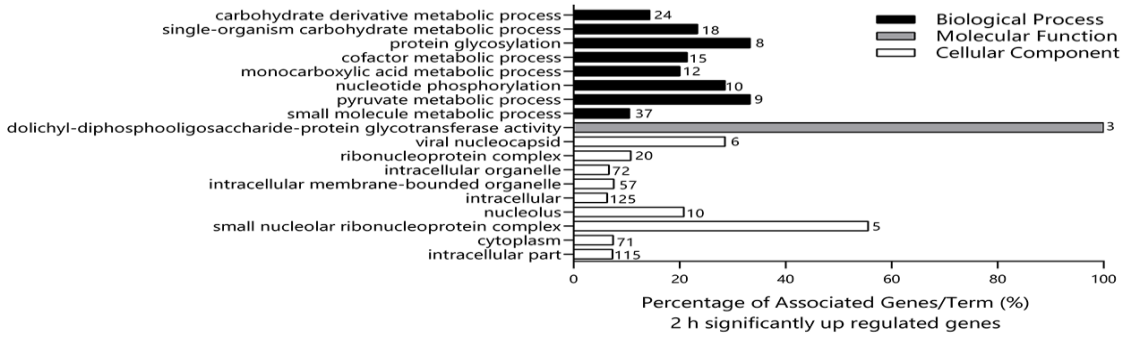

B

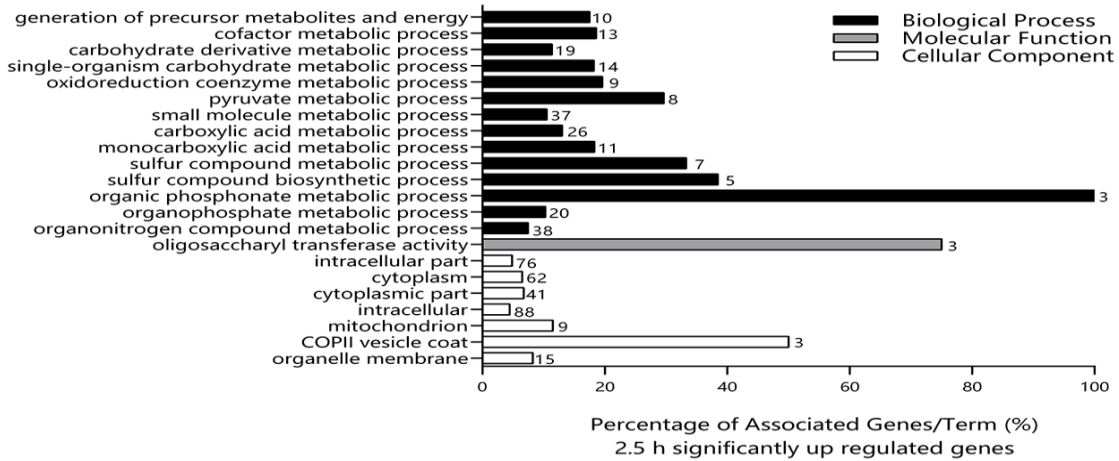

C

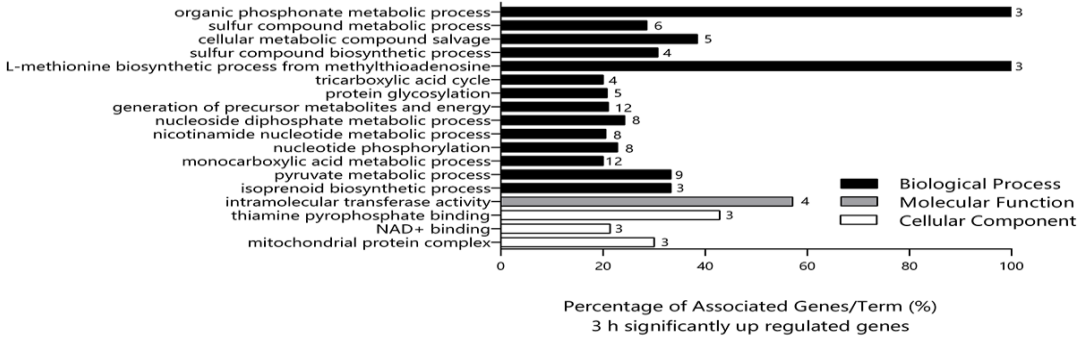

D

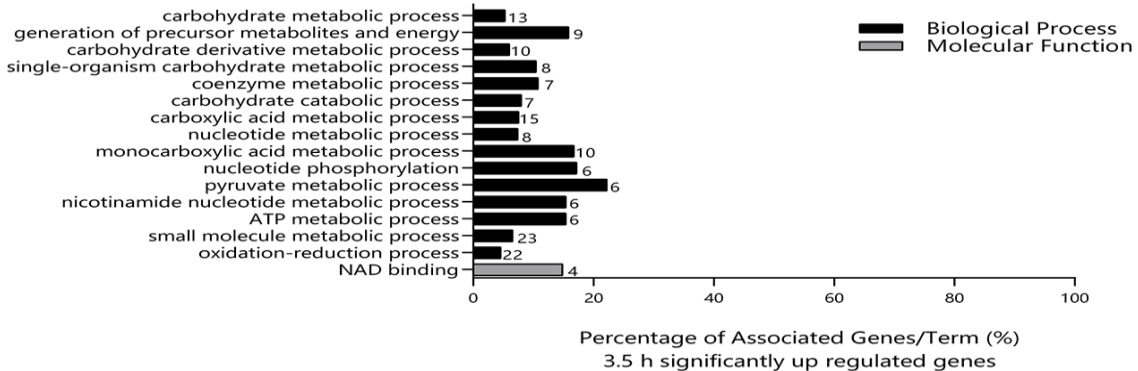

### Supplementary Figure 2

**Gene Ontology (GO) enrichment analysis of up regulated genes:** The filtered significantly up regulated genes (Log2 (fold change) >2 and P value <0.05) of each time point were subjected to GO enrichment analysis separately in biological process, molecular biology and cellular function. (A) Percentage of associated genes/term (%) at 2 h. (B) Percentage of associated genes/term (%) at 2.5 h. (C) Percentage of associated genes/term (%) at 3 h. (D) Percentage of associated genes/term (%) at 3.5 h. The length of bars from the each histogram indicates the percentage of associated genes for each term. The number on top of each bar means the number of associated genes.

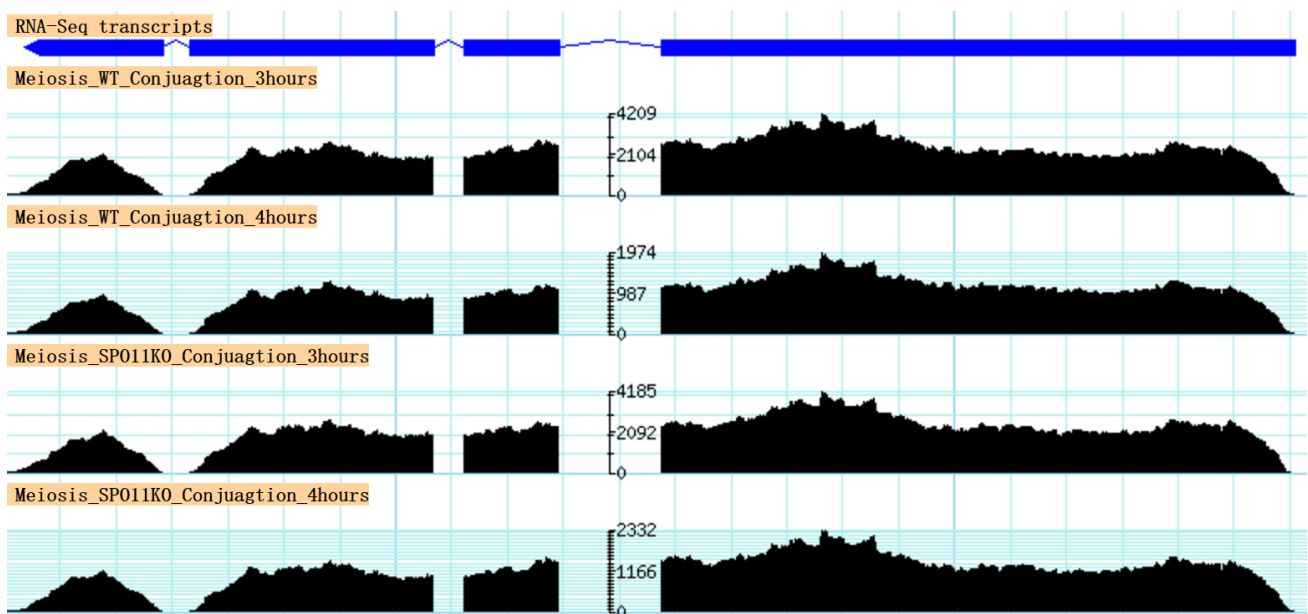

### Supplementary Figure 3

**RNA-Seq Data Tracks From TFGD (Tetrahymena Functional Genomics Database).** The First track shows the CYC2 gene transcripts locus in genome browser. Other tracks show the transcription profile of CYC2 gene in WT 3 h, WT 4h, SPO11 KO 3 h, SPO11 KO 4 h.
